# Supplementary material for: MiR-199a-5p Decreases Esophageal Cancer Cell Proliferation Partially through Repression of Jun-B
Source: MDPI journal article supplement (doi:10.3390/cancers15194811), 2023-09-30
Supplement: s1 [file s1]

Fig.S2B

Full unedited gel for figure 2B ( OE21 and SK-GT-4)

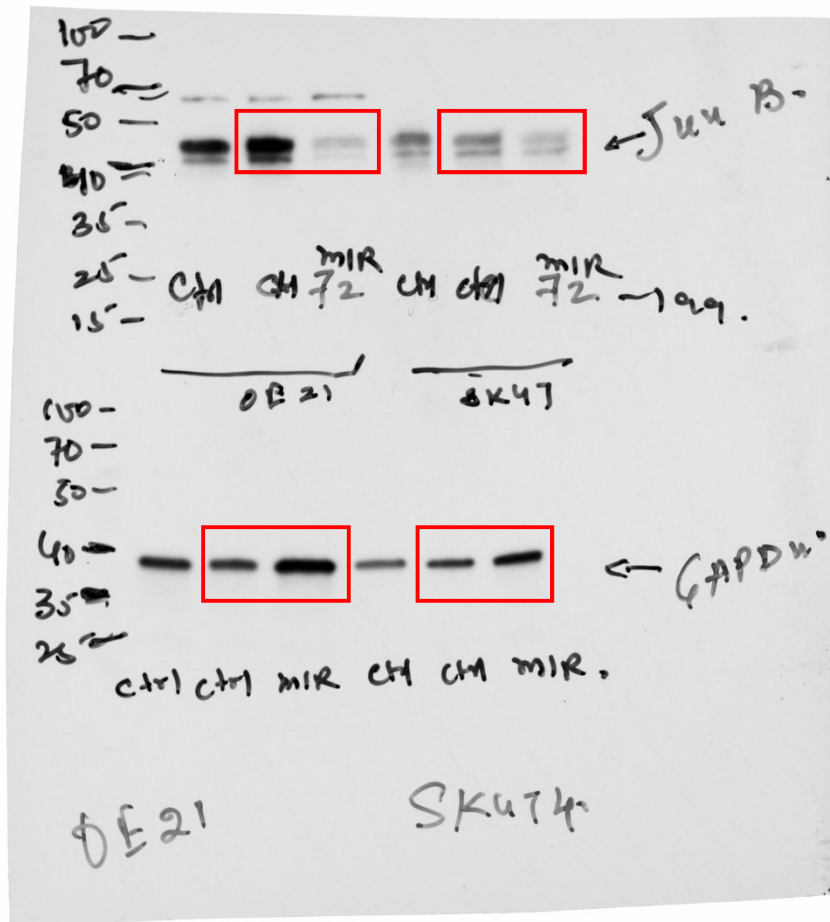

**Fig.S2B.** Original blot for figure 2B (OE21, middle panel and SK-GT-4, right panel). Changes in JunB protein expression following over expression of pre-miR-199a-5p in OE21 and SK-GT-4 cells (top). Protein loading was assessed by GAPDH (bottom).
