# Supplementary material for: MiR-199a-5p Decreases Esophageal Cancer Cell Proliferation Partially through Repression of Jun-B
Source: MDPI journal article supplement (doi:10.3390/cancers15194811), 2023-09-30
Supplement: s1 [file s1]

Fig. S1

Full unedited gel for figure 1D.

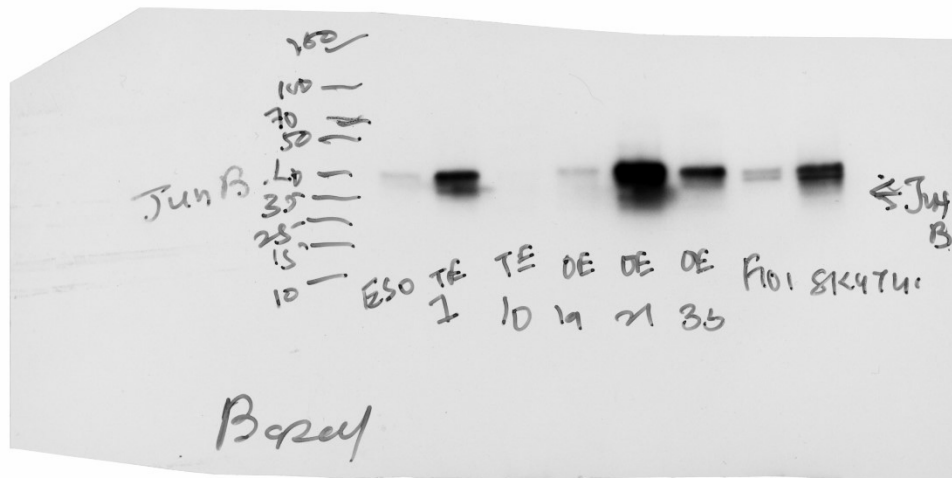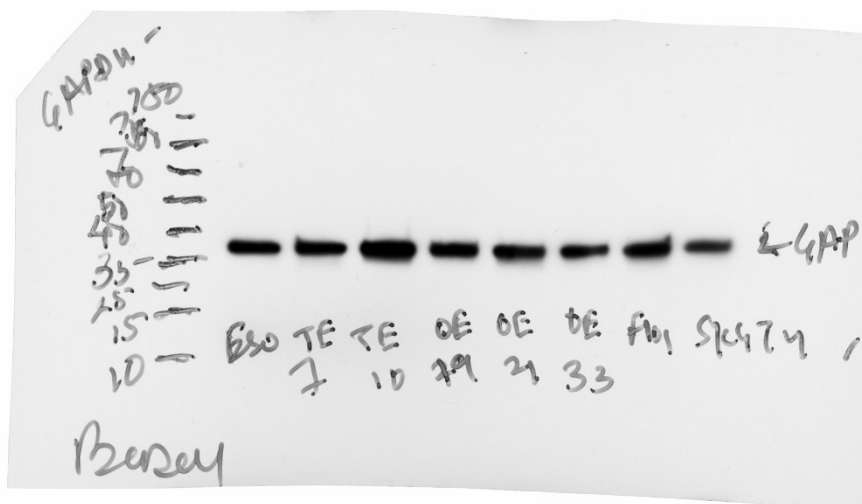

**Fig S1.** Original blot for figure 1D. Endogenous JunB protein expression levels in the human esophageal cell lines (top). GAPDH was used as a loading control (bottom)
