# Supplementary material for: MiR-199a-5p Decreases Esophageal Cancer Cell Proliferation Partially through Repression of Jun-B
Source: MDPI journal article supplement (doi:10.3390/cancers15194811), 2023-09-30
Supplement: s1 [file s1]

Fig.S2A

Full unedited gel for figure 2B ( TE7)

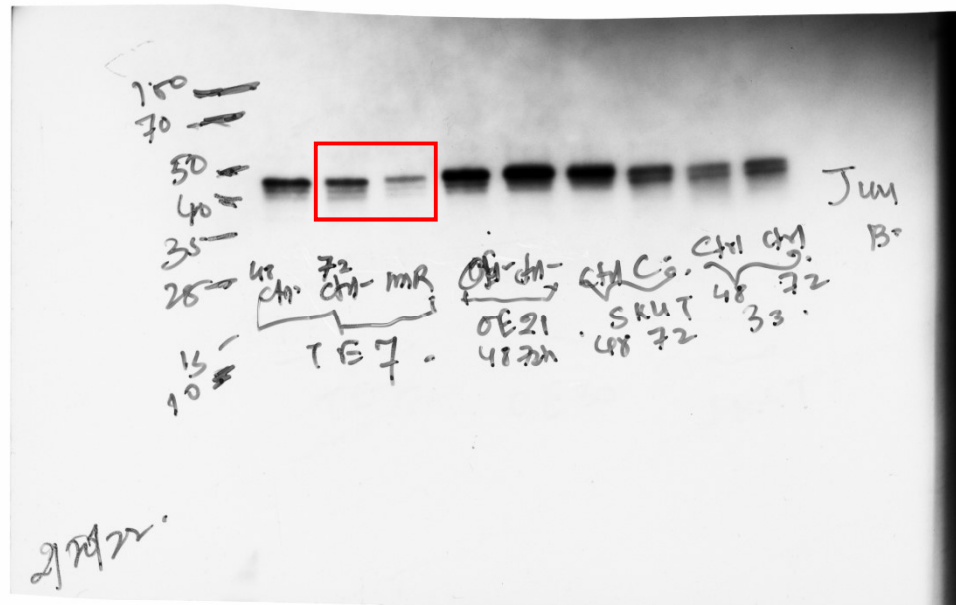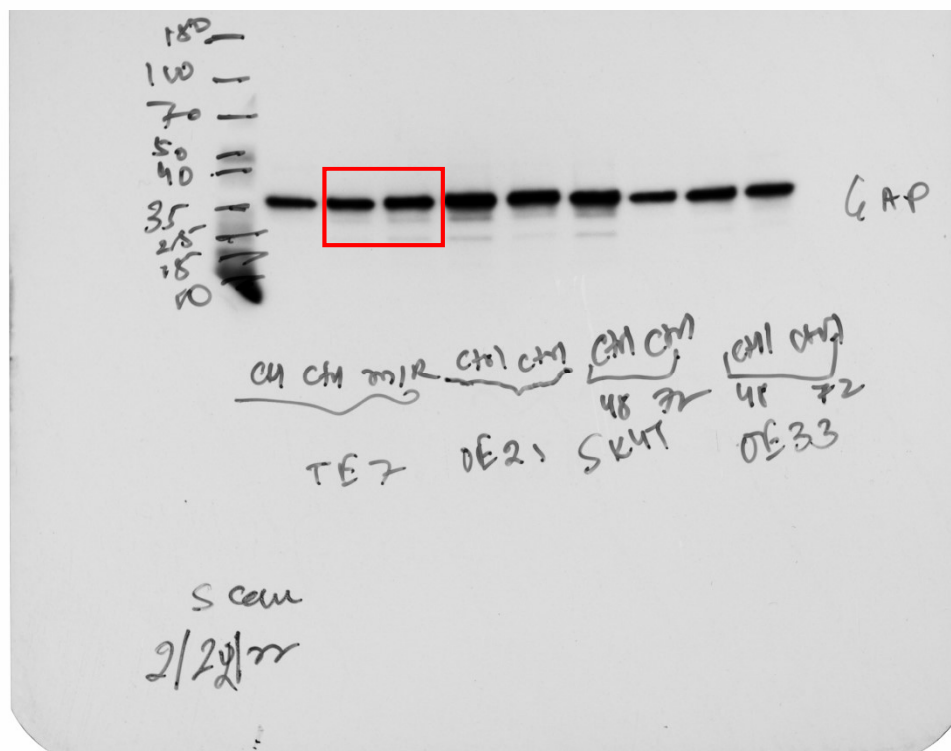

**Fig.S2A.** Original blot for figure 2B (TE7, left panel) Changes in JunB protein expression after overexpressing miR-199a-5p in TE7 cells (top). Protein loading was assessed by GAPDH (bottom)
