# Supplementary material for: MiR-199a-5p Decreases Esophageal Cancer Cell Proliferation Partially through Repression of Jun-B
Source: MDPI journal article supplement (doi:10.3390/cancers15194811), 2023-09-30
Supplement: s1 [file s1]

**Fig. S4A**

Full unedited gel for figure 6A

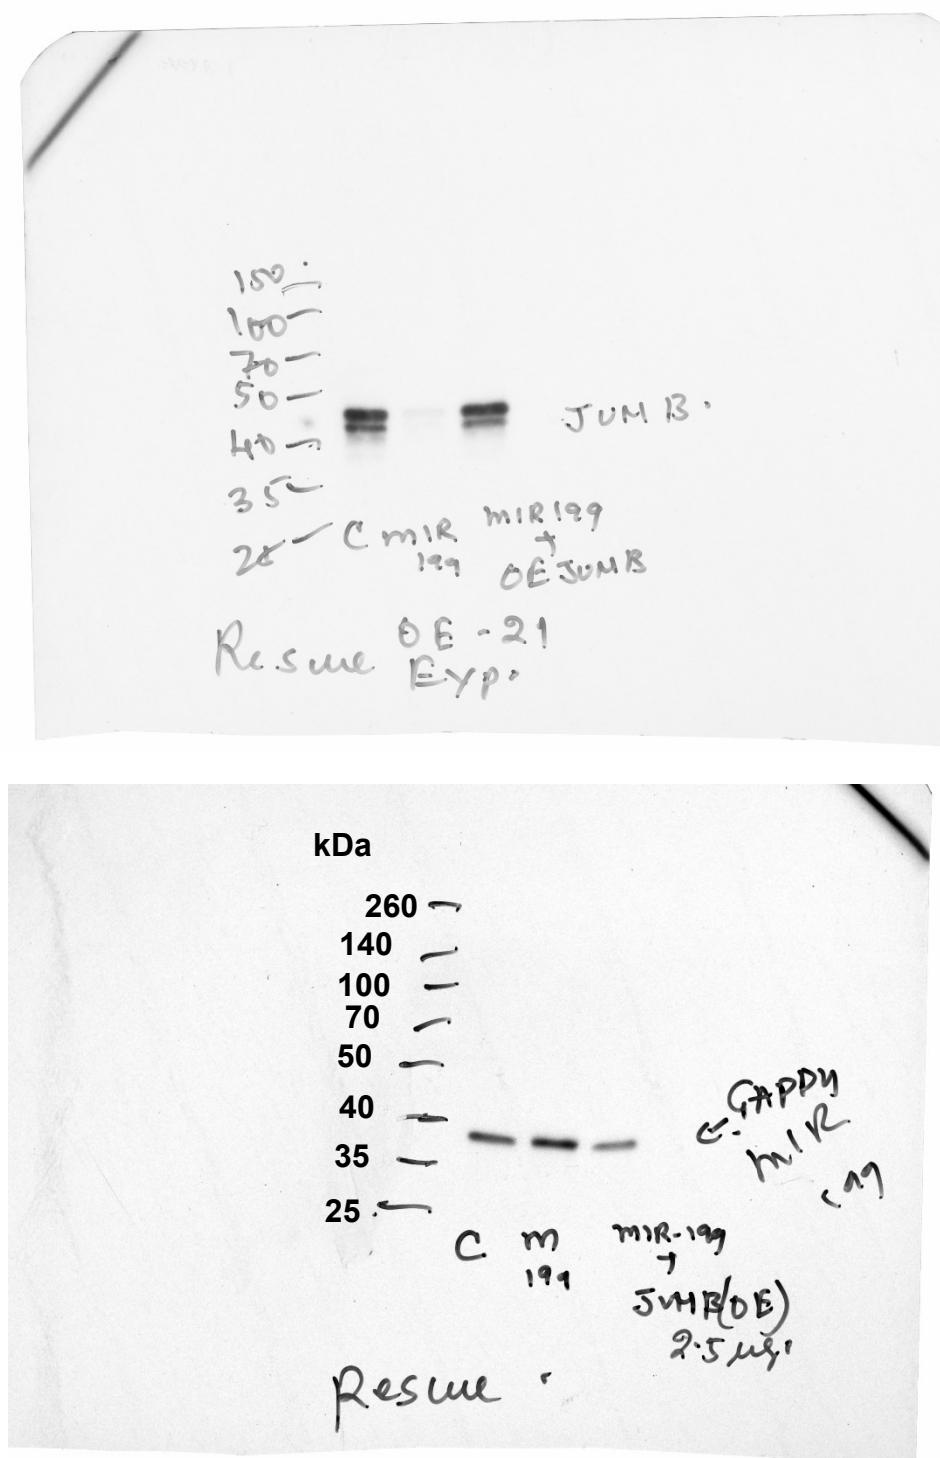

**Fig. S4A.** Original blot for figure 6A. Changes in JunB protein expression (top), in control (first lane), after overexpressing pre-miR-199a-5p alone (middle lane) and co expressing with JunB plasmid (last lane). Protein loading was assessed by GAPDH (bottom).
