# Supplementary material for: MiR-199a-5p Decreases Esophageal Cancer Cell Proliferation Partially through Repression of Jun-B
Source: Cancers (Basel). 2023 Sep 30;15(19):4811. doi: 10.3390/cancers15194811 (PMC10571772; doi:10.3390/cancers15194811)
Supplement: Supplementary file 1 [file cancers-15-04811-s001.zip]

Archive with 6 entries (6 files):
- Fig-S1-Original blot for figure 1D.pdf
- Fig-S2A-Original blot for figure 2B-TE7.pdf
- Fig-S2B-Original blot for figure 2B-OE21-SKGT.pdf
- Fig-S3-Original automated blot for figure 5A.pdf
- Fig-S4A-Original blot for figure 6A-OE21.pdf
- Fig-S4B-Original blot for figure 6B-SKGT.pdf
